# Supplementary material
Source: Royal Society of Chemistry journal article supplement (doi:10.1039/d6fo00799f)
Supplement: d6fo00799f1.pdf [file d6fo00799f1.pdf]

**Table S1. Scoring EAU histopathologically in the rat**

| <b>Grade</b>       | <b>Area of retinal section affected</b> | <b>Criteria</b>                                                                               |
|--------------------|-----------------------------------------|-----------------------------------------------------------------------------------------------|
| <b>0</b>           | <b>None</b>                             | <b>No disease, normal retinal architecture</b>                                                |
| <b>0.5 (trace)</b> | <b>&lt;1/4</b>                          | <b>Mild inflammatory cell infiltration of the retina with or without photoreceptor damage</b> |
| <b>1</b>           | <b>≥1/4</b>                             | <b>Mild inflammation and/or photoreceptor outer segment damage</b>                            |
| <b>2</b>           | <b>≥1/4</b>                             | <b>Mild to moderate inflammation and/or lesion extending to the outer nuclear layer</b>       |
| <b>3</b>           | <b>≥1/4</b>                             | <b>Moderate to marked inflammation and/or lesion extending to the inner nuclear layer</b>     |
| <b>4</b>           | <b>≥1/4</b>                             | <b>Severe inflammation and/or full-thickness retinal damage</b>                               |
